# Supplementary material for: Conversion of furfuryl alcohol to alkyl levulinate fuel additives over Al2O3/SBA-15 catalyst
Source: Royal Society of Chemistry journal article supplement (doi:10.1039/c6se00103c), 2017-01-01
Supplement: c6se00103c1.pdf [file c6se00103c1.pdf]

## Electronic Supplementary Information

### Conversion of furfuryl alcohol into fuel-additives alkyl levulinates over $\text{Al}_2\text{O}_3/\text{SBA-15}$ catalyst

Siva Sankar Enumula, Kumara Swamy Koppadi, Venkata Ramesh Babu Gurram, David Raju Burri, and Seetha Rama Rao Kamaraju\*

Inorganic and Physical Chemistry Division, CSIR-Indian Institute of Chemical Technology, Hyderabad, India-500007.

E-mail: ksramarao@iict.res.in & ksramarao.iict@gov.in

Fax: +91-40-27160921; Tel: +91-40-27193163

The following are the NMR, GC-MS spectra of the BMF, DBP and BL

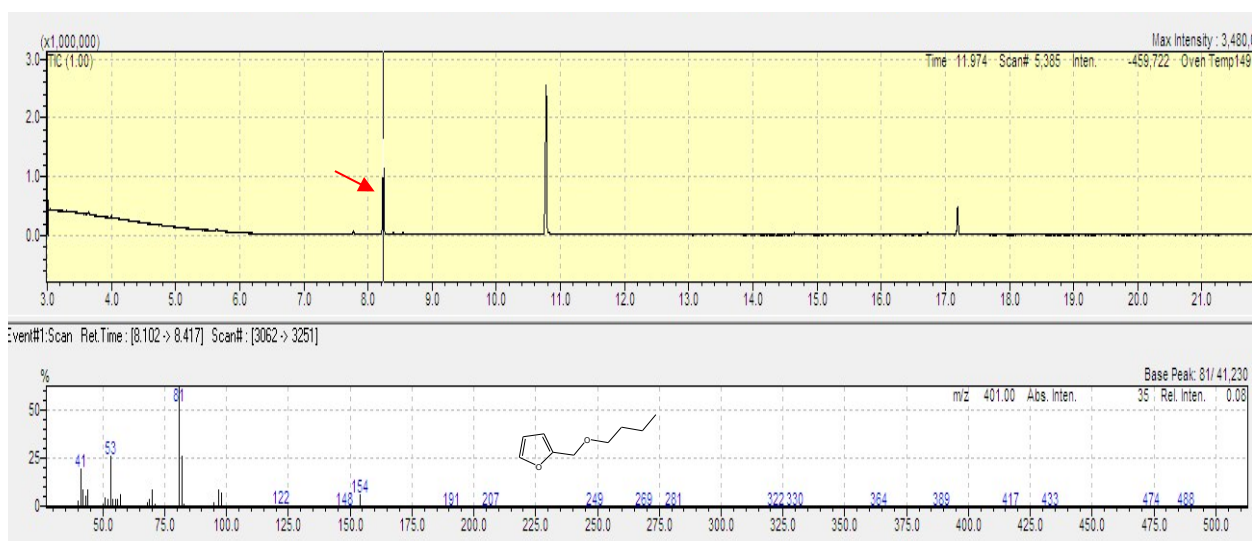

Fig. ES1. GC-MS spectra of 2-butoxy methyl furan (BMF)

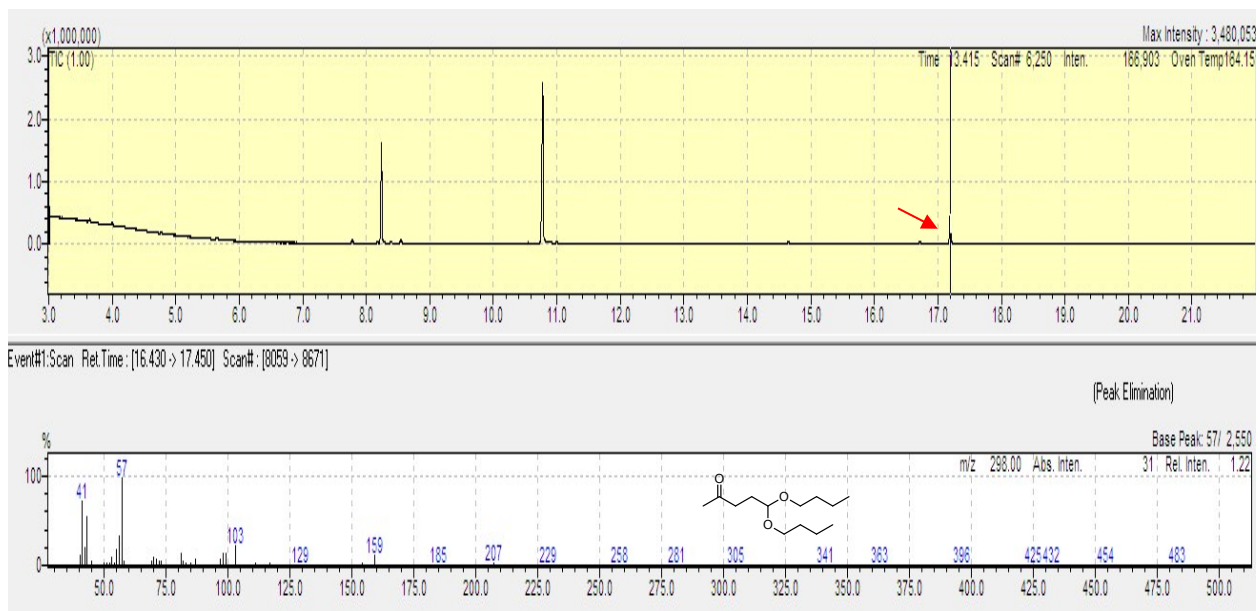

Fig. ES2. GC-MS spectra of 5, 5dibutoxy 2-pentanone (DBP)

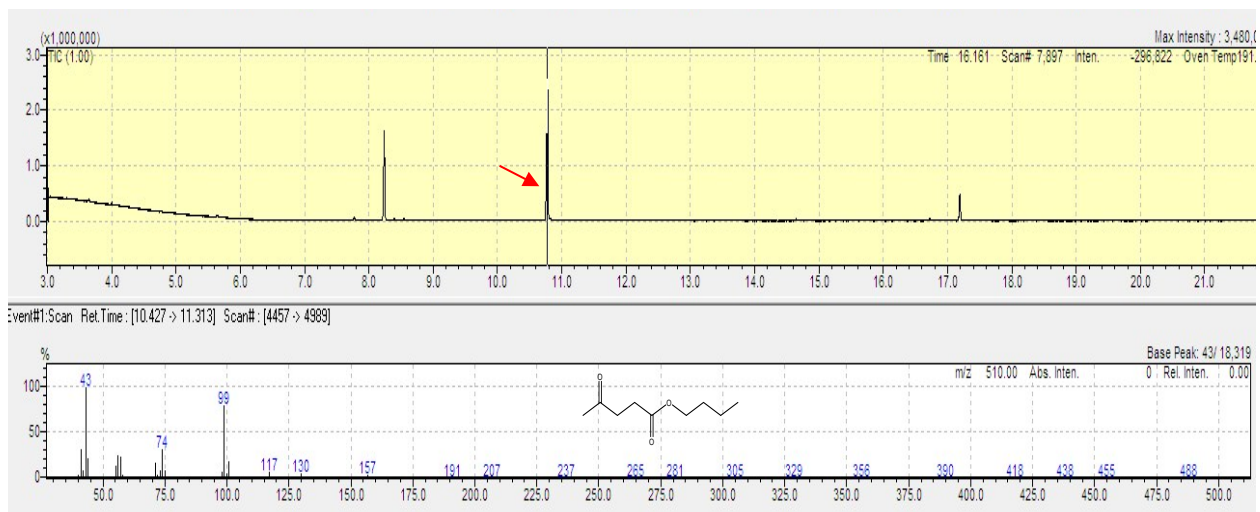

Fig. ES3. GC-MS spectra of n-butyl levulinate

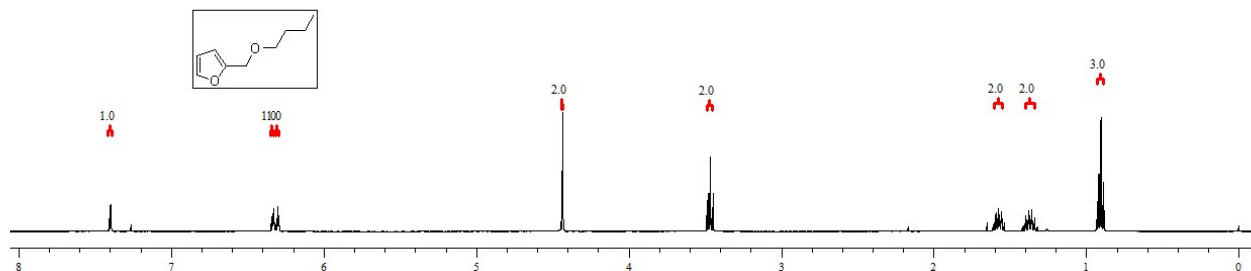

Fig. ES4.  $^1\text{H}$  NMR of 2-butoxy methyl furan (BMF)

$^1\text{H}$  NMR (400 MHz,  $\text{CDCl}_3$ )  $\delta$  7.39-7.4 (m 1H), 6.32-6.34 (m 1H), 6.29-6.31 (m 1H), 4.43 (s 2H), 3.46 (t  $J = 6.76$  2H), 1.53-1.60 (m 2H), 1.33-1.39 (m 2H), 0.9 (t  $J = 7.45$  3H)

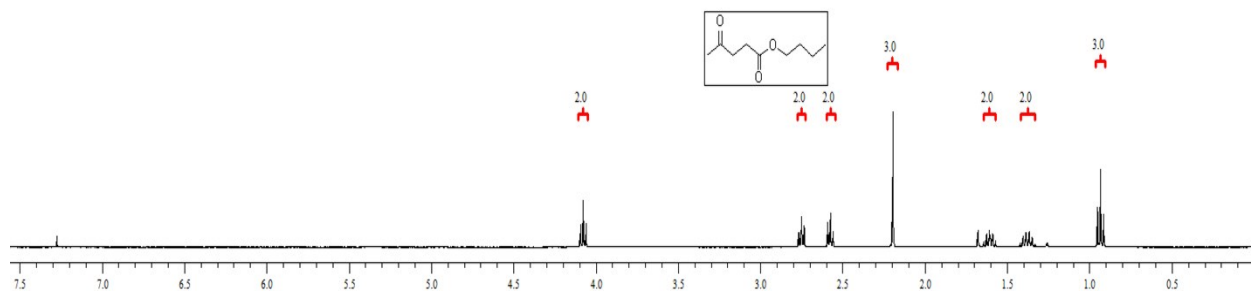

Fig. ES5.  $^1\text{H}$  NMR of n-butyl levulinate.

$^1\text{H}$  NMR (400 MHz,  $\text{CDCl}_3$ )  $\delta$  4.08 (t  $J = 6.48$  2H), 2.75 (t  $J = 6.48$  2H), 2.57 (t  $J = 6.72$  2H), 2.19 (s 3H), 1.56-1.63 (m 2H), 1.34-1.41 (m 2H), 0.95 (t  $J = 7.64$  3H)
